# Supplementary material
Source: publisher figshare collection journal article supplement (https://acs.figshare.com/ndownloader/files/21936651)
Supplement: Supplementary file 1 [file 21936651]

## Supporting Information

Expansile Nanoparticles Encapsulate Factor Quinolinone Inhibitor 1 and Accumulate in Murine Liver upon Intravenous Administration

Patrick Stoiber<sup>1</sup>, Iliny Ekladios<sup>2</sup>, Qing Zhao<sup>3</sup>, Yolonda L. Colson<sup>4</sup>, Scott E. Schaus<sup>5,6</sup>, Ulla Hansen<sup>1\*</sup>, Mark W. Grinstaff<sup>2,5\*</sup>

<sup>1</sup>MCBB Graduate Program and Department of Biology, Boston University, Boston, MA 02215

<sup>2</sup>Department of Biomedical Engineering, Boston University, Boston, MA 02215

<sup>3</sup>Department of Pathology and Laboratory Medicine, Boston University Medical Center, Boston, MA 02118

<sup>4</sup>Division of Thoracic Surgery, Massachusetts General Hospital, Harvard Medical School, Boston, MA 02215, USA.

<sup>5</sup>Department of Chemistry, Boston University, Boston, MA 02215

<sup>6</sup>Center for Molecular Discovery, Boston University, Boston, MA 02215

### Scheme S1. Scheme for the preparation of the polymer/nanoparticles.

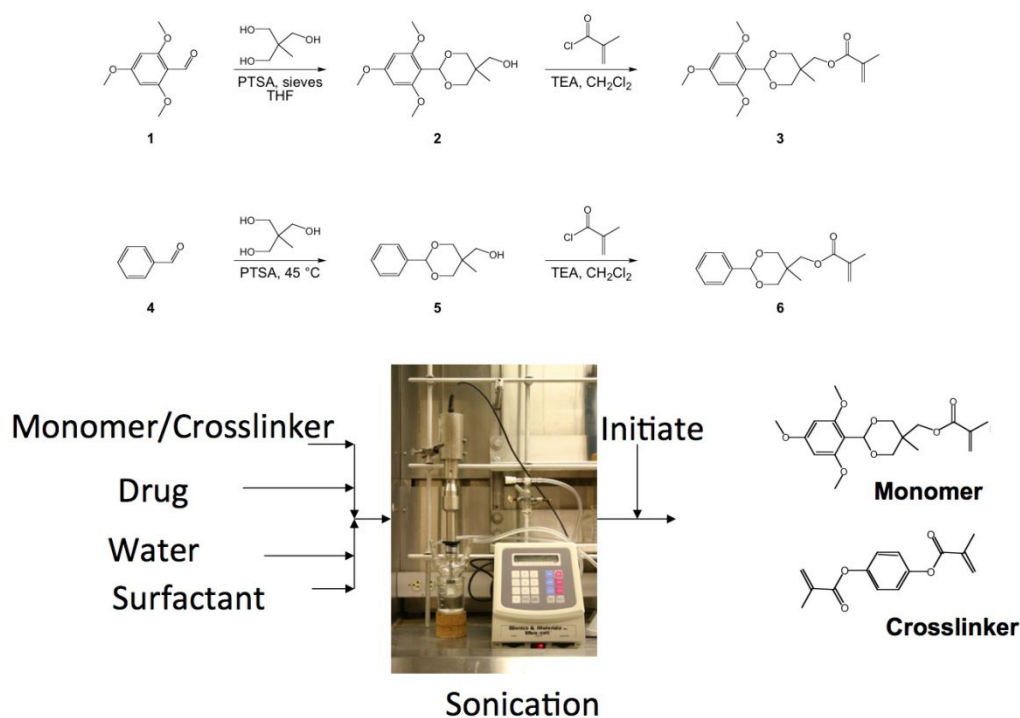

| Leukocytes   | Mouse # | Treatment | white blood cells |            |                  | neutrophils          |            |               | lymphocytes     |           |               | monocytes               |           |               | eosinophils                 |           |               | basophils                                 |           |               |                       |        |               |
|--------------|---------|-----------|-------------------|------------|------------------|----------------------|------------|---------------|-----------------|-----------|---------------|-------------------------|-----------|---------------|-----------------------------|-----------|---------------|-------------------------------------------|-----------|---------------|-----------------------|--------|---------------|
|              |         |           | result            | normal     | hematological    | result               | normal     | hematological | result          | normal    | hematological | result                  | normal    | hematological | result                      | normal    | hematological | result                                    | normal    | hematological |                       |        |               |
|              |         |           | (in K/ $\mu$ l)   | range      | abnormalities    | (in K/ $\mu$ l)      | range      | abnormalities | (in K/ $\mu$ l) | range     | abnormalities | (in K/ $\mu$ l)         | range     | abnormalities | (in K/ $\mu$ l)             | range     | abnormalities | (in K/ $\mu$ l)                           | range     | abnormalities |                       |        |               |
|              | 1       | PBS       | high              |            | leukocytosis     | 176.14               |            | neutrophilia  | 32.44           |           | lymphocytosis | 9.47                    |           | monocytosis   | 120.45                      |           | eosinophilia  | 53.21                                     |           | basophilia    |                       |        |               |
|              | 2       | PBS       | high              |            | leukocytosis     | 185.31               |            | neutrophilia  | 29.32           |           | lymphocytosis | 8.73                    |           | monocytosis   | 152.58                      |           | eosinophilia  | 85.37                                     |           | basophilia    |                       |        |               |
|              | 3       | PBS       | high              |            | leukocytosis     | 177.98               |            | neutrophilia  | 29.62           |           | lymphocytosis | 9.42                    |           | monocytosis   | 138.64                      |           | eosinophilia  | 71.05                                     |           | basophilia    |                       |        |               |
|              | 4       | eNP       | high              | 1.8 - 10.7 | leukocytosis     | 176.71               | 0.1 - 2.4  | neutrophilia  | 30.31           | 0.9 - 9.3 | lymphocytosis | 9                       | 0.0 - 0.4 | monocytosis   | 132.63                      | 0.0 - 0.2 | eosinophilia  | 65.73                                     | 0.0 - 0.2 | basophilia    |                       |        |               |
|              | 5       | eNP       | 6.28              |            | normal           | 1.96                 |            | normal        | 3.82            |           | normal        | 0.33                    |           | normal        | 0.12                        |           | normal        | 0.04                                      |           | normal        |                       |        |               |
|              | 6       | eNP       | 8.66              |            | normal           | 2.61                 |            | neutrophilia  | 4.77            |           | normal        | 0.48                    |           | monocytosis   | 0.56                        |           | eosinophilia  | 0.24                                      |           | basophilia    |                       |        |               |
|              | 7       | eNP       | 9.6               |            | normal           | 2.48                 |            | neutrophilia  | 6.73            |           | normal        | 0.32                    |           | normal        | 0.05                        |           | normal        | 0.02                                      |           | normal        |                       |        |               |
|              | 8       | eNP       | 10.28             |            | normal           | 3.72                 |            | neutrophilia  | 4.33            |           | normal        | 0.8                     |           | monocytosis   | 1.05                        |           | eosinophilia  | 0.38                                      |           | basophilia    |                       |        |               |
| Erythrocytes | Mouse # | Treatment | red blood cells   |            |                  | hemoglobin           |            |               | hematocrit      |           |               | mean corpuscular volume |           |               | mean corpuscular hemoglobin |           |               | mean corpuscular hemoglobin concentration |           |               | red cell distribution |        |               |
|              |         |           | result            | normal     | hematological    | result               | normal     | hematological | result          | normal    | hematological | result                  | normal    | hematological | result                      | normal    | hematological | result                                    | normal    | hematological | result                | normal | hematological |
|              |         |           | (in M/ $\mu$ l)   | range      | abnormalities    | (in g/dl)            | range      | abnormalities | (in %)          | range     | abnormalities | (in fl)                 | range     | abnormalities | (in g/dl)                   | range     | abnormalities | (in g/dl)                                 | range     | abnormalities | (in %)                | range  | abnormalities |
|              | 1       | PBS       | 6.84              |            | normal           | high                 |            | high          | 38.8            |           | normal        | 56.7                    |           | normal        | high                        |           | high          | high                                      |           | high          | 18                    |        | normal        |
|              | 2       | PBS       | 9.39              |            | normal           | high                 |            | high          | 50.9            |           | polycythemia  | 54.2                    |           | normal        | high                        |           | high          | high                                      |           | high          | 19.5                  |        | normal        |
|              | 3       | PBS       | 8.56              |            | normal           | high                 |            | high          | 46              |           | polycythemia  | 53.7                    |           | normal        | high                        |           | high          | high                                      |           | high          | 19.4                  |        | normal        |
|              | 4       | eNP       | 8.25              | 6.36 -     | normal           | high                 | 11.0 -     | high          | 47.5            | 35.1 -    | polycythemia  | 57.6                    | 45.4 -    | normal        | high                        | 14.1 -    | high          | high                                      | 30.2 -    | high          | 18.9                  | 12.4 - | normal        |
|              | 5       | eNP       | 8.34              | 9.42       | normal           | 15.1                 | 15.1       | normal        | 50              | 45.4      | polycythemia  | 59.9                    | 60.3      | normal        | 18.1                        | 19.3      | normal        | 30.2                                      | 34.2      | normal        | 14.7                  | 27.0   | normal        |
|              | 6       | eNP       | 6.91              |            | normal           | 11.1                 |            | normal        | 38.8            |           | normal        | 56.2                    |           | normal        | 16.1                        |           | normal        | 28.6                                      |           | low           | 14.6                  |        | normal        |
|              | 7       | eNP       | 8.47              |            | normal           | 14.5                 |            | normal        | 48.4            |           | polycythemia  | 57.1                    |           | normal        | 17.1                        |           | normal        | 30                                        |           | low           | 14.7                  |        | normal        |
|              | 8       | eNP       | 9.61              |            | polycythemia     | 16.1                 |            | high          | 54              |           | polycythemia  | 56.2                    |           | normal        | 16.8                        |           | normal        | 29.8                                      |           | low           | 17.1                  |        | normal        |
| Thrombocytes | Mouse # | Treatment | platelet count    |            |                  | mean platelet volume |            |               |                 |           |               |                         |           |               |                             |           |               |                                           |           |               |                       |        |               |
|              |         |           | result            | normal     | hematological    | result               | normal     | hematological |                 |           |               |                         |           |               |                             |           |               |                                           |           |               |                       |        |               |
|              |         |           | (in K/ $\mu$ l)   | range      | abnormalities    | (in fl)              | range      | abnormalities |                 |           |               |                         |           |               |                             |           |               |                                           |           |               |                       |        |               |
|              | 1       | PBS       | 1761              |            | normal           | 5.7                  |            | normal        |                 |           |               |                         |           |               |                             |           |               |                                           |           |               |                       |        |               |
|              | 2       | PBS       | 1755              |            | normal           | 6.1                  |            | normal        |                 |           |               |                         |           |               |                             |           |               |                                           |           |               |                       |        |               |
|              | 3       | PBS       | 2077              |            | normal           | 5.7                  |            | normal        |                 |           |               |                         |           |               |                             |           |               |                                           |           |               |                       |        |               |
|              | 4       | eNP       | 1344              | 592 - 2972 | normal           | 6.1                  | 5.0 - 20.0 | normal        |                 |           |               |                         |           |               |                             |           |               |                                           |           |               |                       |        |               |
|              | 5       | eNP       | 222               |            | thrombocytopenia | 5.8                  |            | normal        |                 |           |               |                         |           |               |                             |           |               |                                           |           |               |                       |        |               |
|              | 6       | eNP       | 521               |            | thrombocytopenia | 6                    |            | normal        |                 |           |               |                         |           |               |                             |           |               |                                           |           |               |                       |        |               |
|              | 7       | eNP       | 253               |            | thrombocytopenia | 6.1                  |            | normal        |                 |           |               |                         |           |               |                             |           |               |                                           |           |               |                       |        |               |
|              | 8       | eNP       | 384               |            | thrombocytopenia | 5.5                  |            | normal        |                 |           |               |                         |           |               |                             |           |               |                                           |           |               |                       |        |               |

**Table S1. Hematological analysis of eNP- versus PBS-treated CD-1 mice 24 h after injection.** In eNP-injected mice numbers 5-8, little toxicity was observed with only a slight increase in neutrophil, monocyte, eosinophil, and basophil counts and minimal polycythemia; noticeably, these mice experienced thrombocytopenia. In mice numbers 1-4 (three control mice and one eNP-treated mouse), the initial tail-vein injection was inefficient, therefore resulting in a second attempt of tail vein injection; this is likely the cause for abnormalities observed in leukocyte counts and other profiles.

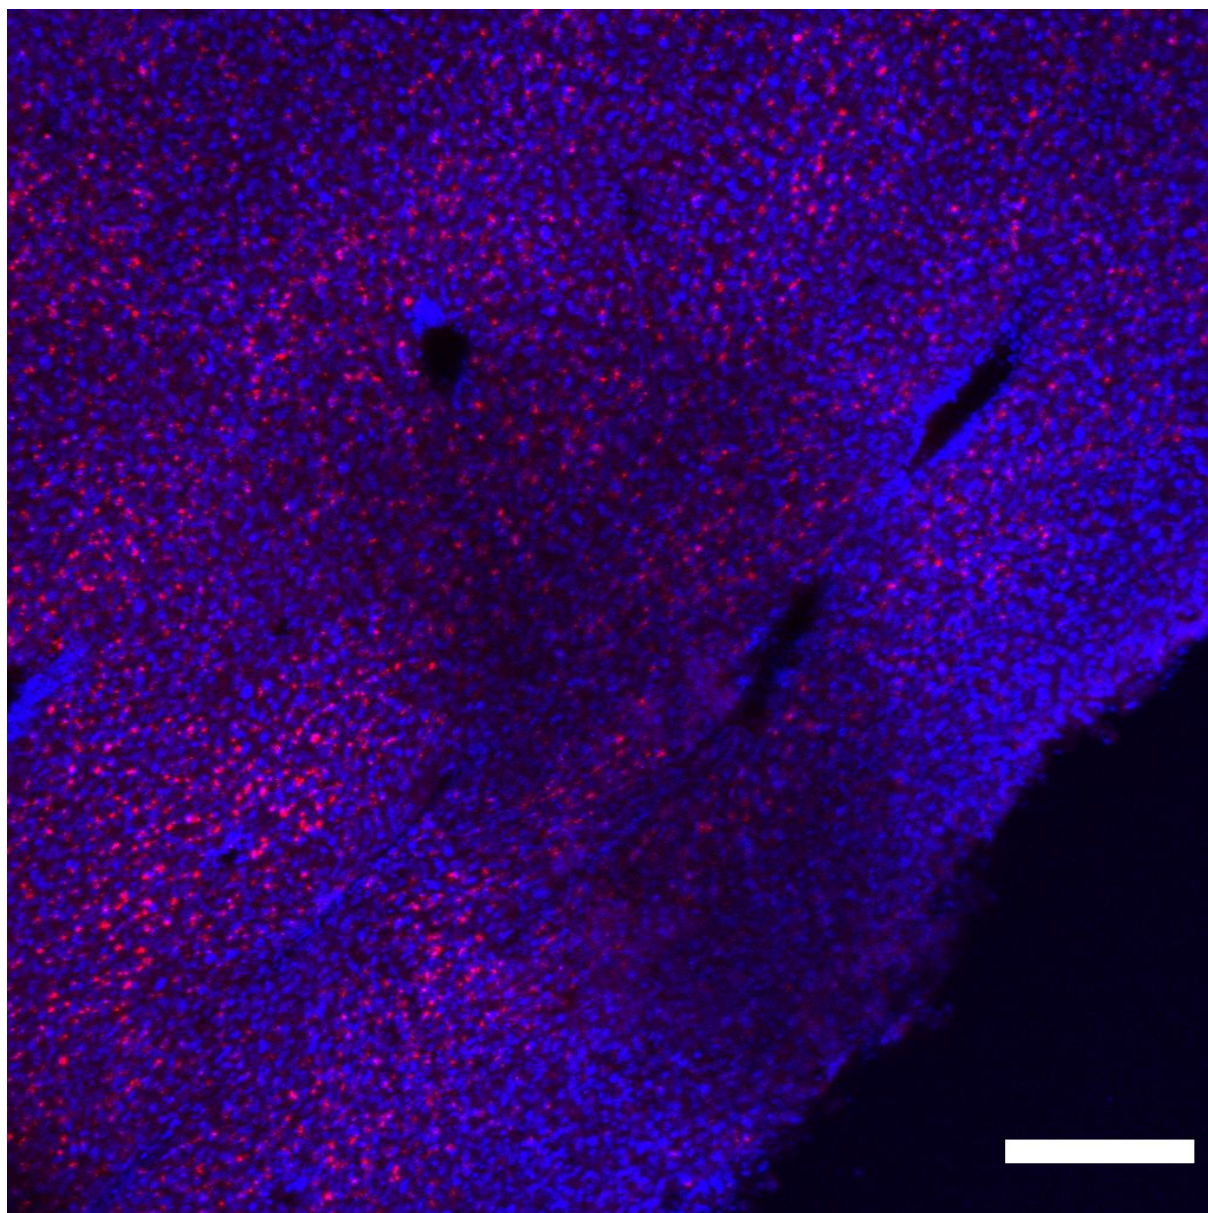

**Figure S1. Accumulation of rho-eNPs in mouse liver after 48 hours.** Image of liver section of CD-1 mouse treated with rho-eNP intravenously at a dosage of 62.5mg/kg. Animal was sacrificed 48 hours after injection and liver was fixed, cryosectioned and stained with Hoechst. Red and blue denote rho-eNPs and Hoechst, respectively. Scale bar is 200  $\mu\text{m}$

eNP

+

-

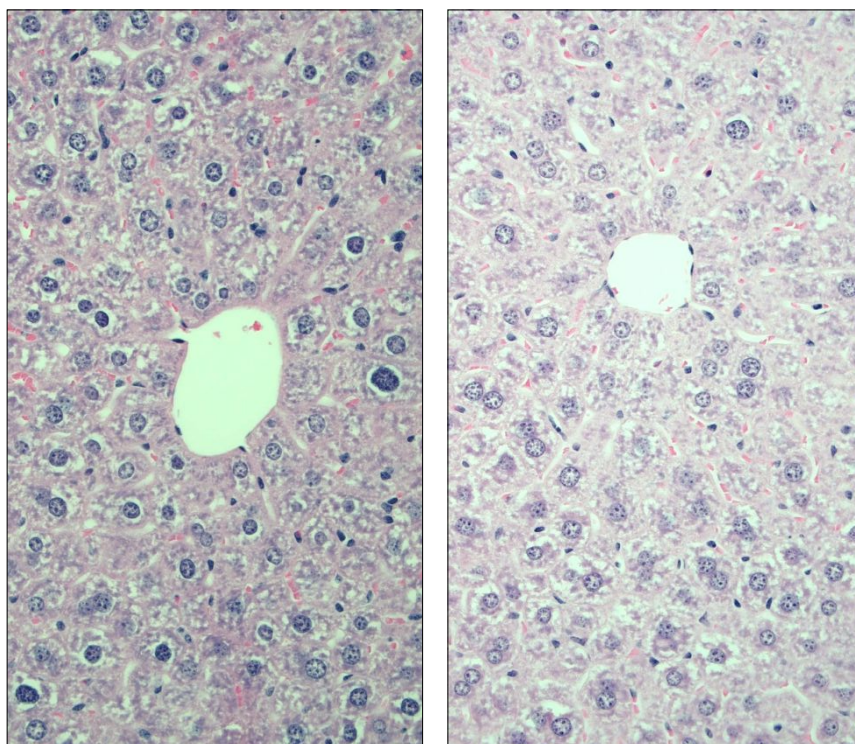

**Figure S2. Higher magnification of H&E stained liver sections of eNP- versus PBS-treated CD-1 mice 24 h after injection.** Images of H&E stained sections of liver of eNP- and vehicle-treated male CD-1 mice 24 hours after injection. Both treatment groups exhibited minor toxicological abnormalities, including Kupffer cell hyperplasia, enlarged or lost nuclei, and vacuolation. Because these observations occurred in both treatment conditions, it suggests that these abnormalities resulted from damage incurred by the tail-vein injection, the animal euthanasia, or the organ processing.

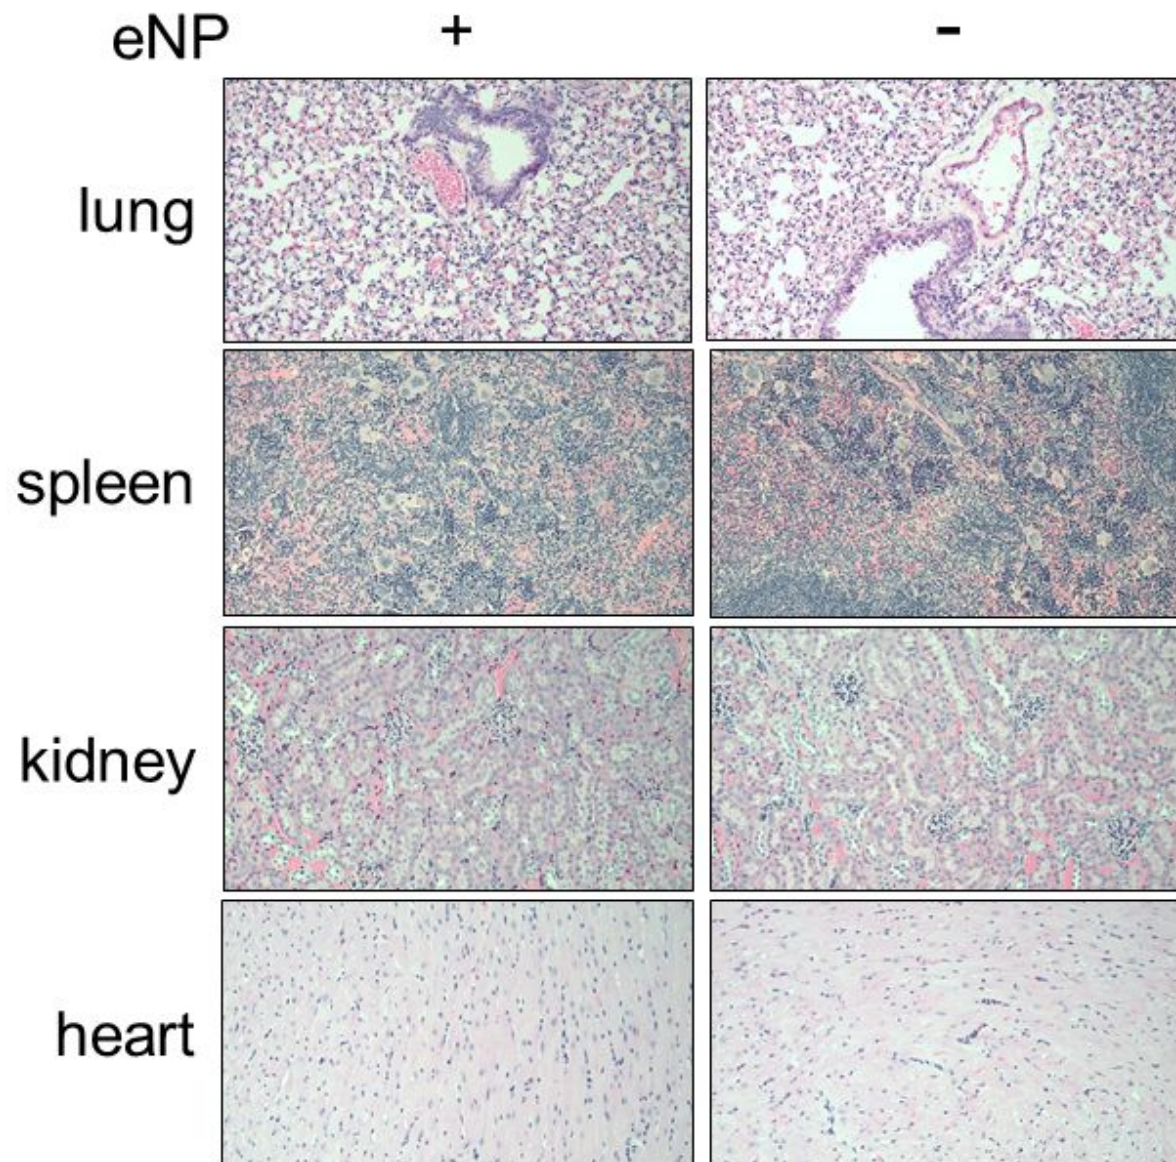

**Figure S3. Pathological examination of H&E stained organs sections of eNP- versus PBS-treated CD-1 mice 24 h after injection.** Images of H&E stained sections of heart, lung, kidney, and spleen of eNP- and vehicle-treated male CD-1 mice 24 hours after injection. No toxicity was detectable in treated versus control organs.
